# Supplementary material for: Newly-Obtained Two Organic-Inorganic Hybrid Compounds Based on Potassium Peroxidomolybdate and Dicarboxypyridinic Acid: Structure Determination, Catalytic Properties, and Cytotoxic Effects of Eight Peroxidomolybdates in Colon and Hepatic Cancer Cells
Source: MDPI journal article supplement (doi:10.3390/ma15010241), 2021-12-29
Supplement: s1 [file s1]

## Supplementary Materials

# Newly-Obtained Two Organic-Inorganic Hybrid Compounds Based on Potassium Peroxidomolybdate and Dicarboxypyridinic Acid: Structure Determination, Catalytic Properties, and Cytotoxic Effects of Eight Peroxidomolybdates in Colon and Hepatic Cancer Cells

Adrianna Sławińska <sup>1</sup>, Małgorzata Tyszką-Czochara <sup>2</sup>, Paweł Serda <sup>3</sup>, Marcin Oszejca <sup>3</sup>,  
Małgorzata Ruggiero-Mikołajczyk <sup>1</sup>, Katarzyna Pamin <sup>1</sup>, Robert Karcz <sup>1</sup> and Wiesław Łasocha <sup>1,3,\*</sup>

- <sup>1</sup> Jerzy Haber Institute of Catalysis and Surface Chemistry, Polish Academy of Sciences, Niezapominajek 8, 30-239 Krakow, Poland; adrianna.slawska@ikifp.edu.pl (A.S.); malgorzata.ruggiero-mikolajczyk@ikifp.edu.pl (M.R.-M.); katarzyna.pamin@ikifp.edu.pl (K.P.); robert.karcz@ikifp.edu.pl (R.K.)  
<sup>2</sup> Faculty of Pharmacy, Jagiellonian University Medical College, Medyczna 9, 30-688 Krakow, Poland; malgorzata.tyszka-czochara@uj.edu.pl  
<sup>3</sup> Faculty of Chemistry, Jagiellonian University, Gronostajowa 2, 30-387 Krakow, Poland; pawel.serda@uj.edu.pl (P.S.); oszejcam@chemia.uj.edu.pl (M.O.)  
\* Correspondence: lasocha@chemia.uj.edu.pl

### Register

1. Selected lengths of bonds for **K26dcpa** and **K35dcpa**.
2. Rietveld refinement plots for **K35dcpa**.
3. TG/DSC investigations for **K35dcpa** and **K26dcpa**
4. Catalysis for selected compounds comparing I, II, III run.
5. X-ray diffraction, IR spectroscopy, an elemental analysis for selected compounds *K-nicO*, *K-picO*, *NH<sub>4</sub>-nicO*, **K35dcpa**, **K26dcpa** and *Na-picO* before and after BV reaction.

### 1. Selected lengths of bonds for K26dcpa and K35dcpa.

Table S1. Selected bond lengths (Å) in the studied compounds.

| K26dcpa  |            | K35dcpa |          |
|----------|------------|---------|----------|
| Mo1 – O8 | 1.6898(17) | Mo1-O4  | 1.68(11) |
| Mo1 -O6  | 1.9176(24) | Mo1-O6  | 1.92(9)  |
| Mo1 -O9  | 1.9239(25) | Mo1-O3  | 1.93(6)  |
| Mo1-O12  | 1.9484(27) | Mo1-O5  | 2.20(9)  |
| Mo1-O10  | 1.9813(28) | Mo1-O9  | 2.02(8)  |
| Mo1-O4   | 2.0332(20) | Mo1-O10 | 1.99(6)  |
| Mo1N1    | 2.4054(17) | Mo1-O3  | 1.93(6)  |
| O4-O11   | 2.2286(27) | O6-O9   | 1.36(8)  |
| O5-O7    | 2.2385(39) | O7-O3   | 1.34(11) |
| O6-O12   | 1.4728(32) | O18-O7  | 2.24(11) |
| C2-O5    | 1.2314(46) | C1-O1   | 1.28(7)  |
| C2-O7    | 1.2806(43) | C1-O2   | 1.27(7)  |
| C5-O11   | 1.2105(39) | O5-N1   | 1.33(8)  |
| C5-O4    | 1.3101(30) |         |          |

## 2. Rietveld refinement plots for K35dcpa.

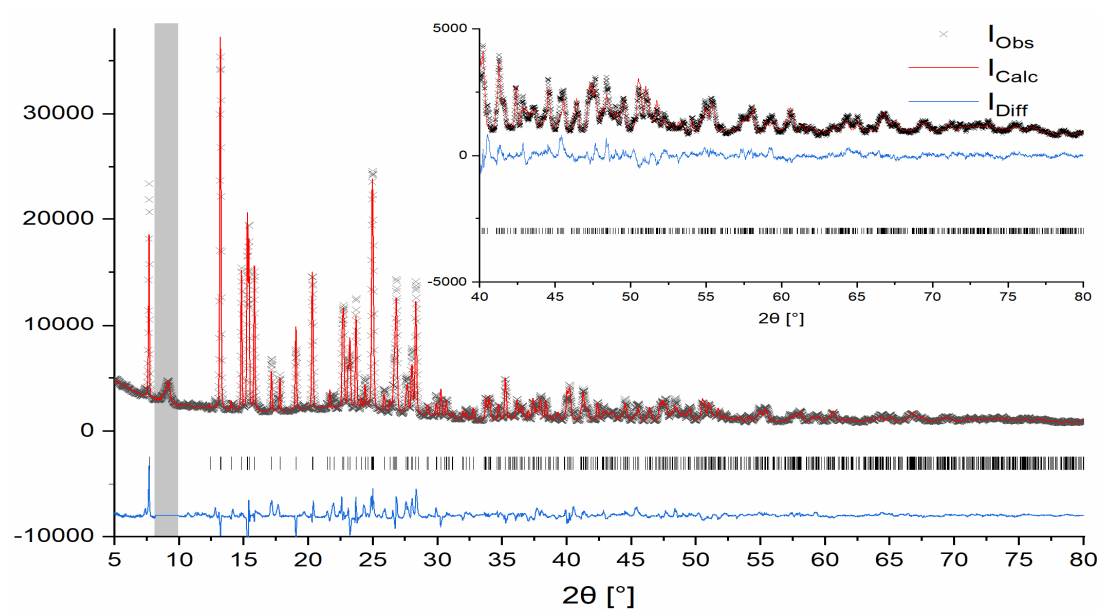

**Figure S1. K35dcpa** - Final Rietveld refinement plots [JANA2006 program]. Gray bar indicates the so-called 'excluded region' - excluded due to the presence of diffraction lines from the 'capillary system'.

### 3. TG/DSC investigations for K35dcpa and K26dcpa.

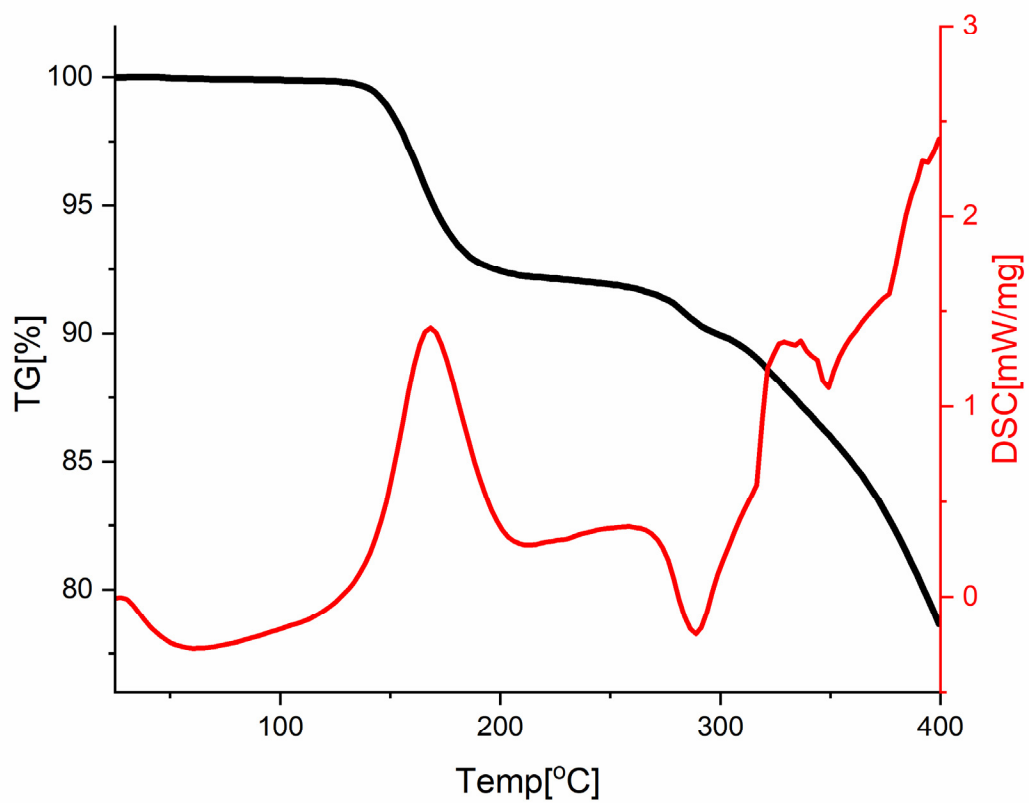

Figure S2. TG/DSC investigation for K26dcpa.

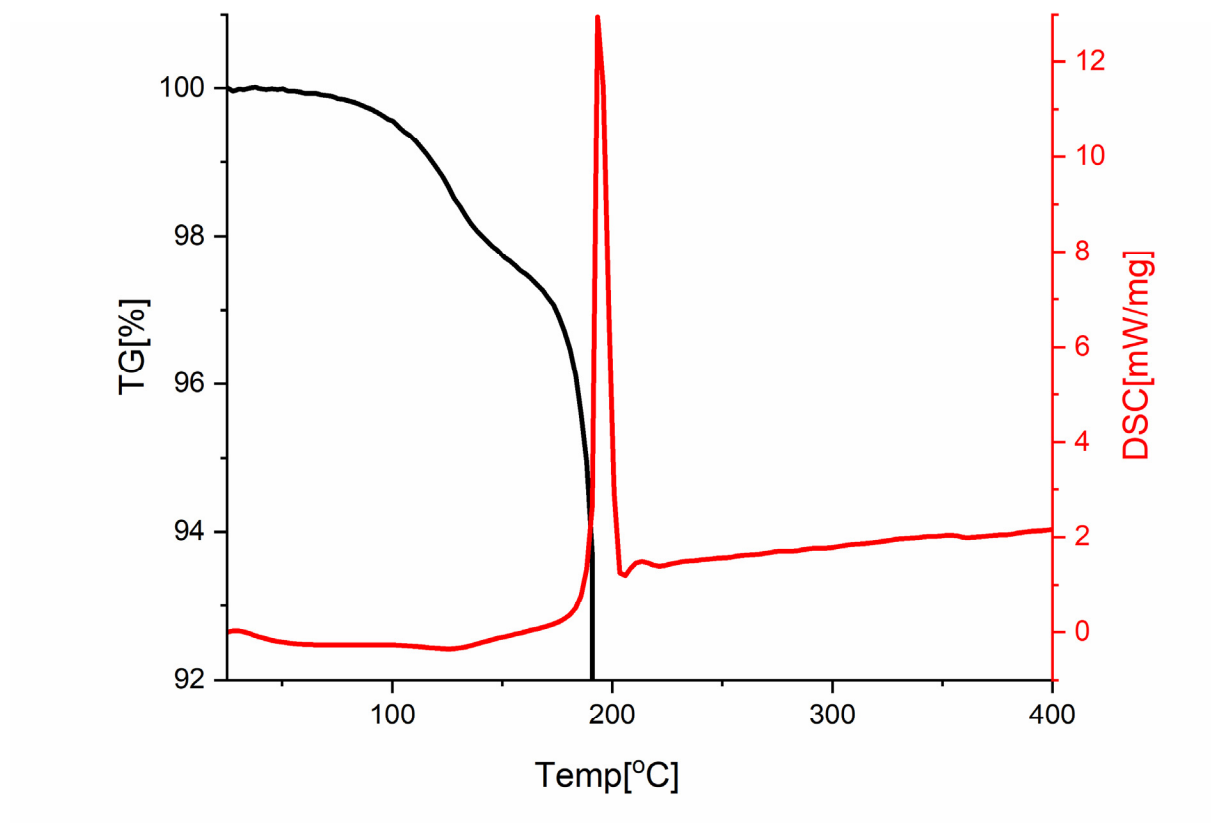

**Figure S3.** TG/DSC investigation for **K35dcpa**.

#### 4. Catalysis for selected compounds comparing I, II, III run.

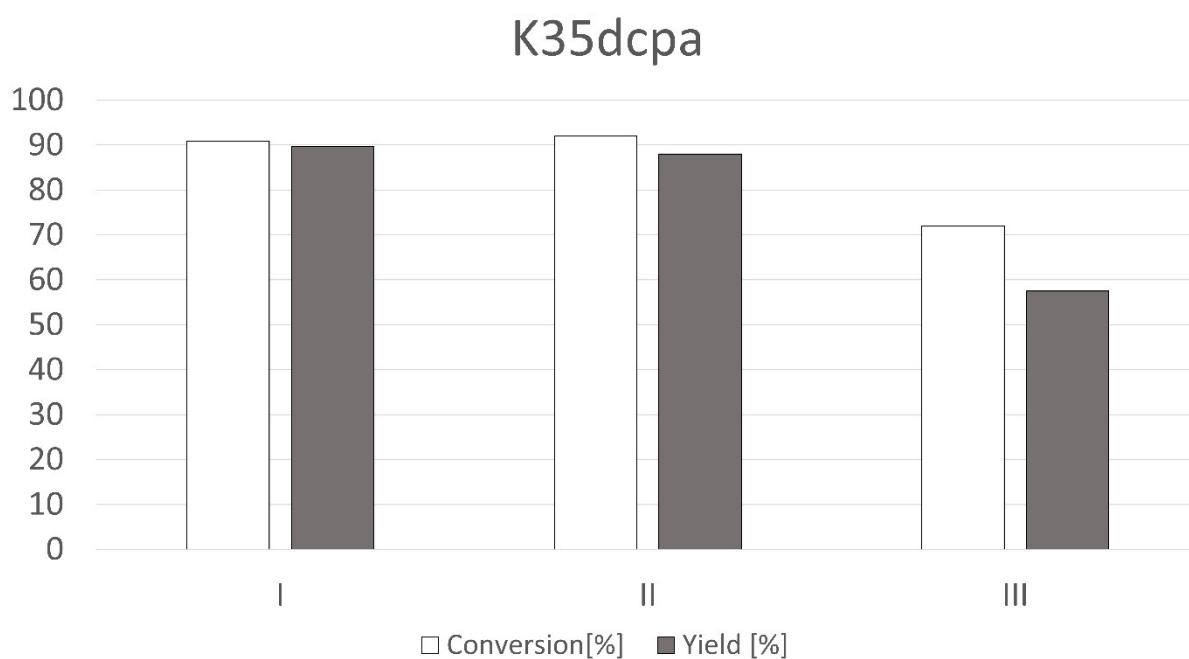

**Figure S4.** The BV oxidation of cyclohexanone with **K35dcpa** as catalyst in I, II, III run.

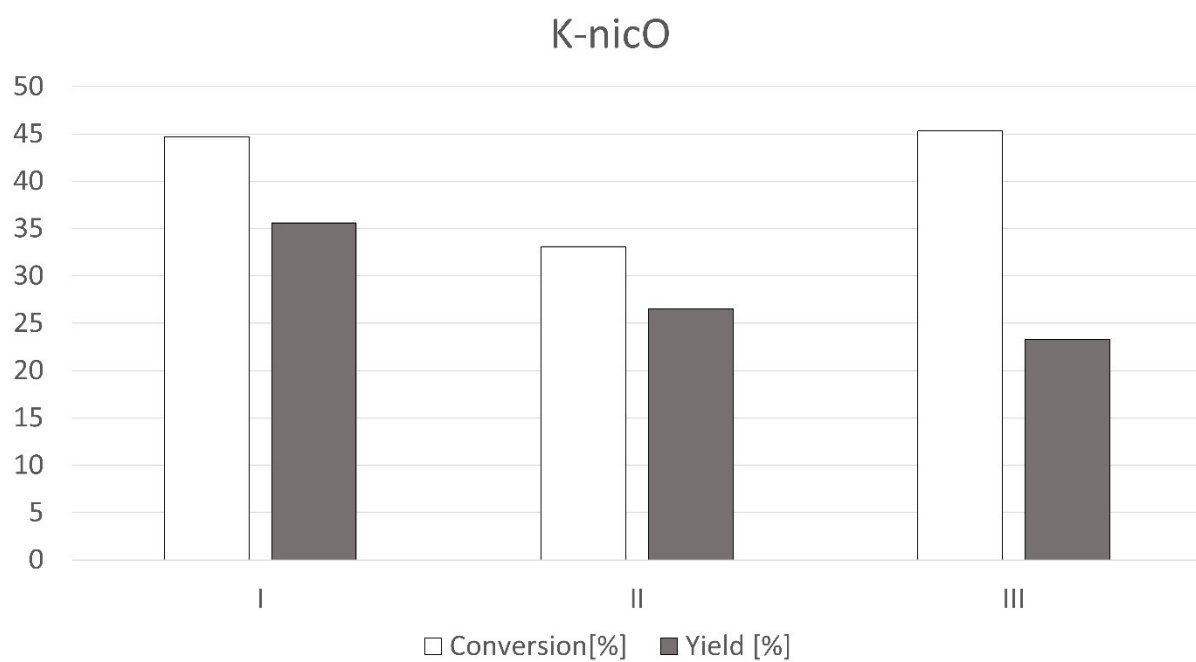

**Figure S5.** The BV oxidation of cyclohexanone with **K-nicO** as catalyst in I, II, III run.

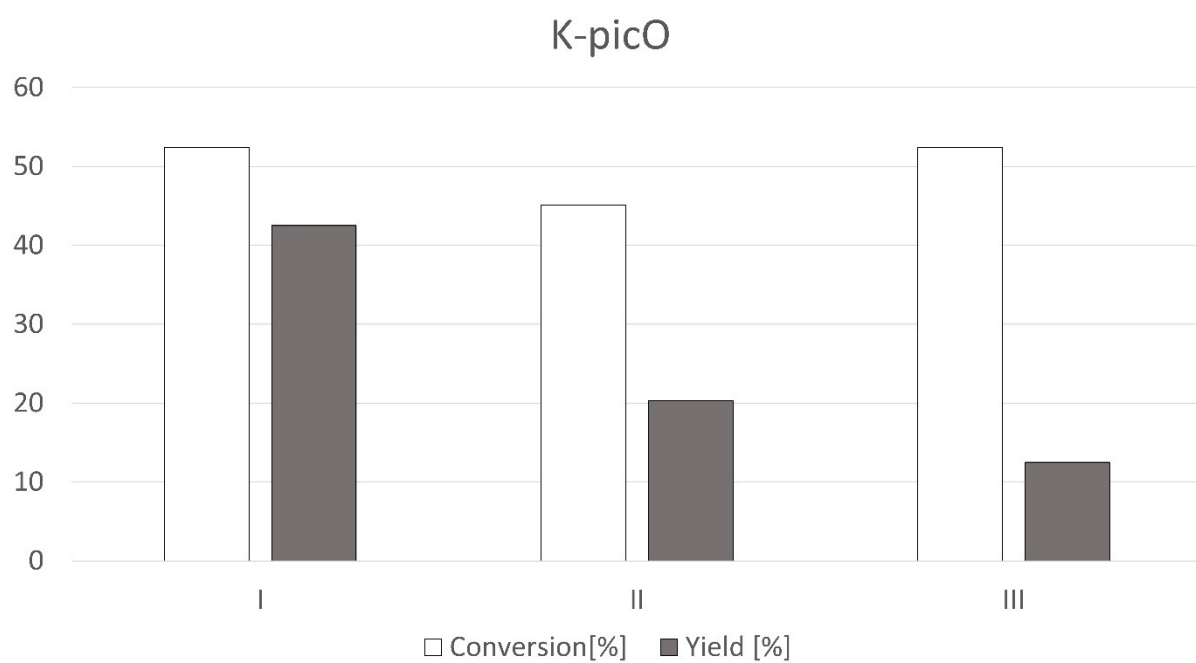

**Figure S6.** The BV oxidation of cyclohexanone with **K-picO** as catalyst in I, II, III run.

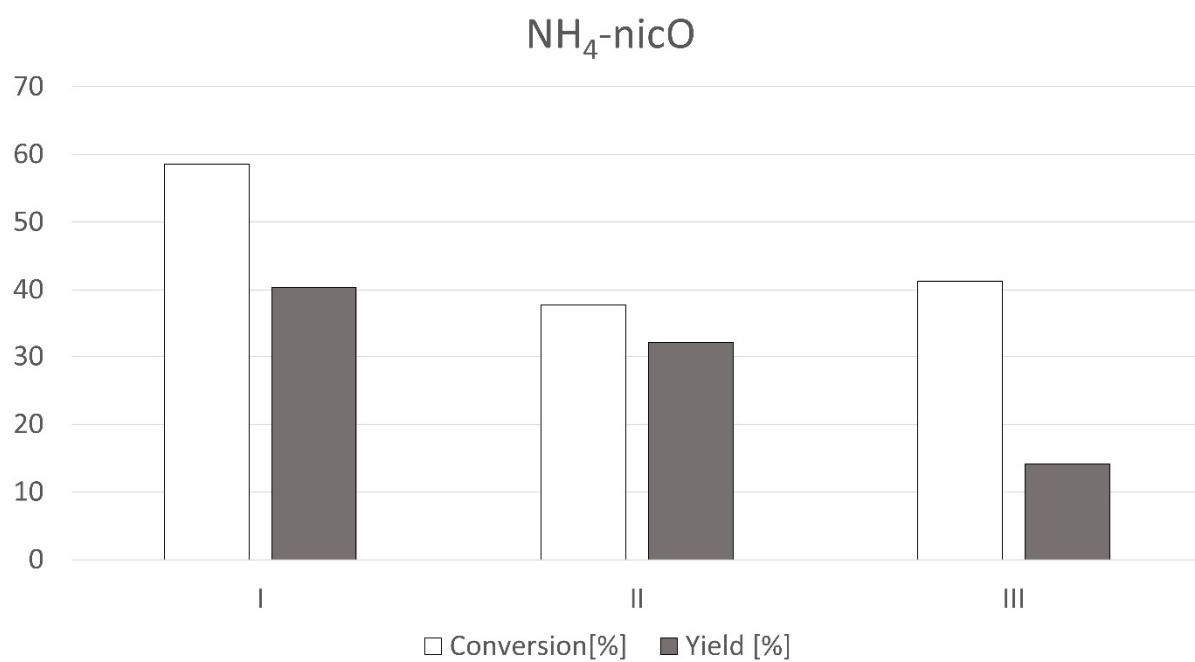

**Figure S7.** The BV oxidation of cyclohexanone with **NH<sub>4</sub>-nicO** as catalyst in I, II, III run.

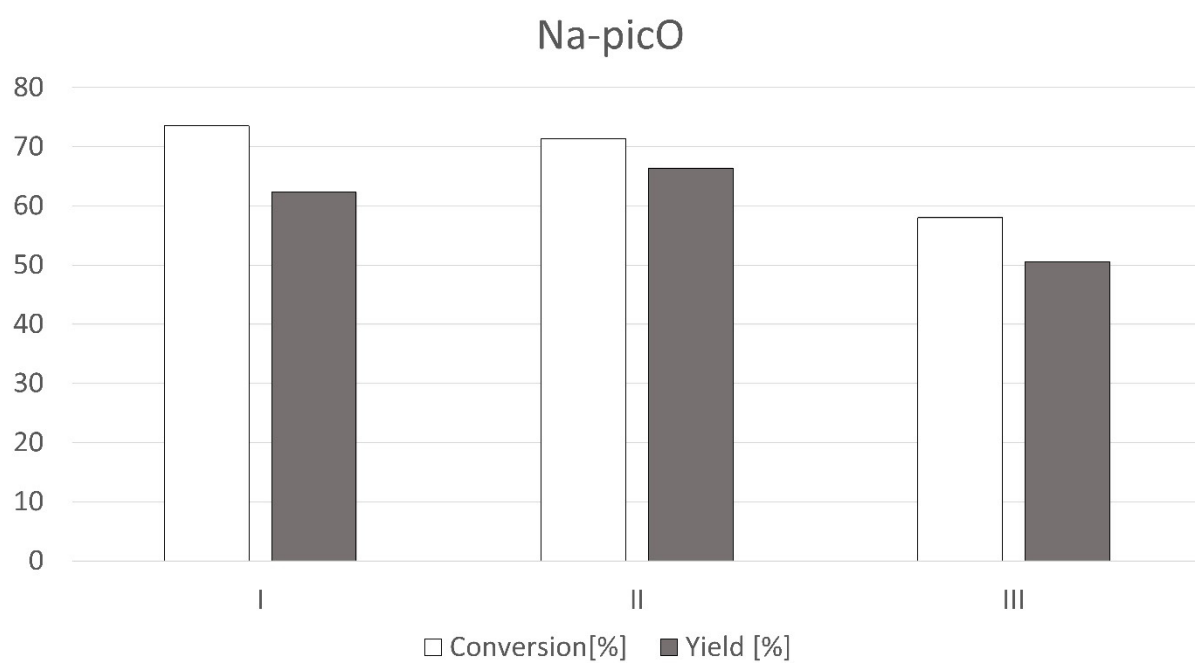

**Figure S8.** The BV oxidation of cyclohexanone with **Na-picO** as catalyst in I, II, III run.

**5. X-ray diffraction, IR spectroscopy, an elemental analysis for selected compounds K-nicO, K-picO, NH<sub>4</sub>-nicO, K35dcpa, K26dcpa and Na-picO before and after BV reaction.**

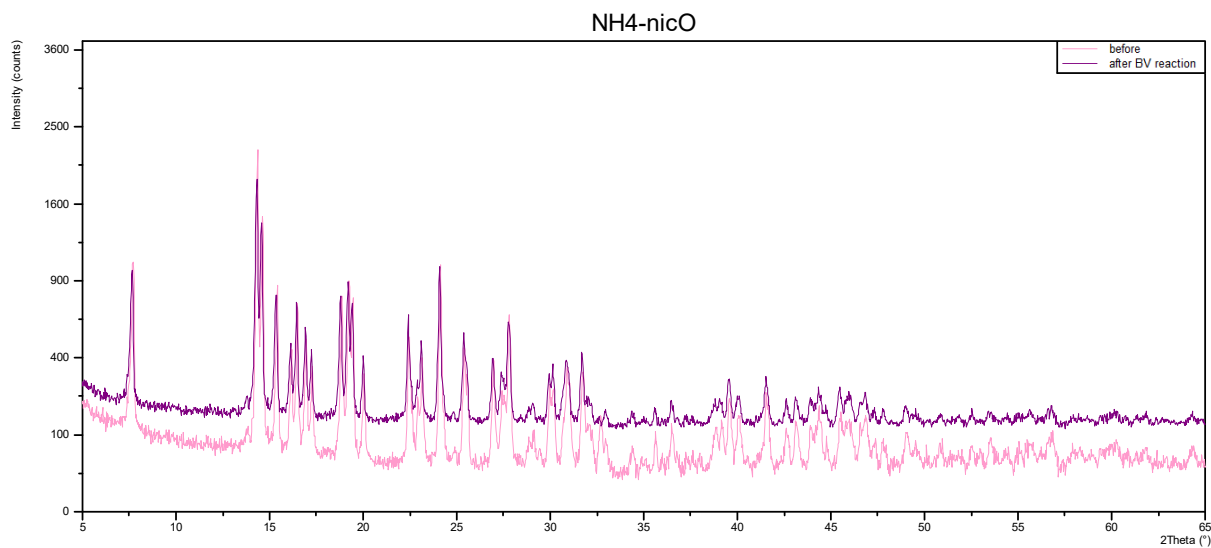

**Figure S9.** PXRD before and after BV reaction for NH<sub>4</sub>-nicO.

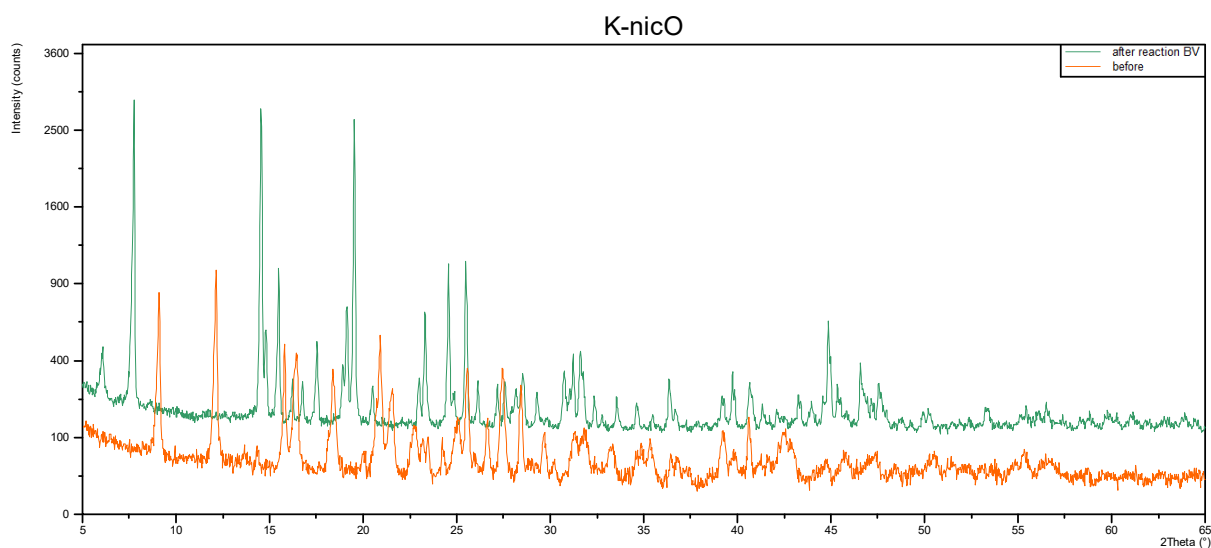

**Figure S10.** PXRD before and after BV reaction for K-nicO.

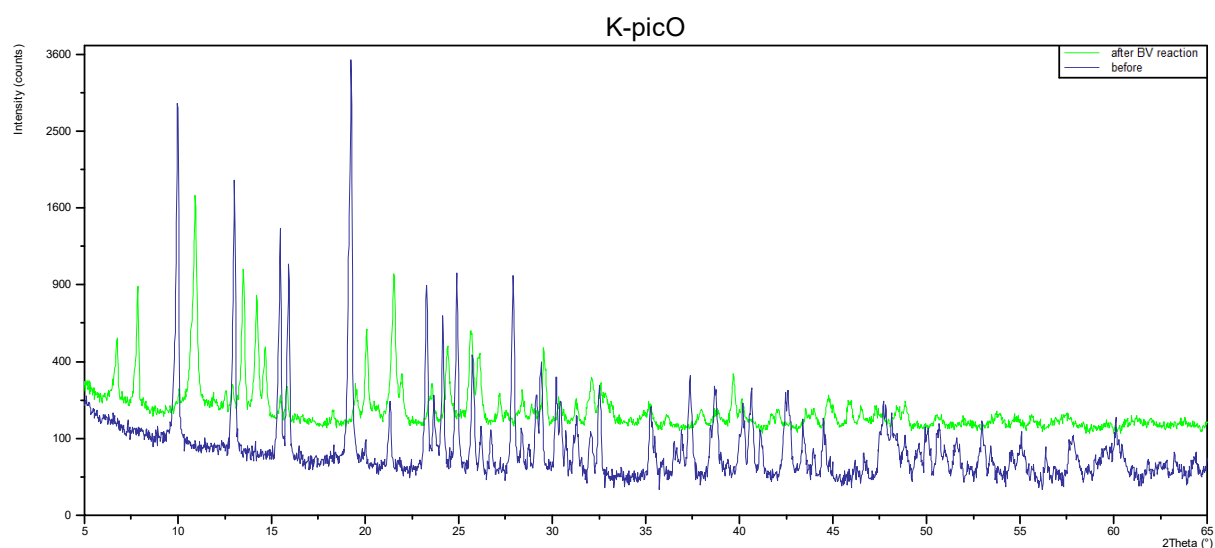

**Figure S11.** PXRD before and after BV reaction for K-picO.

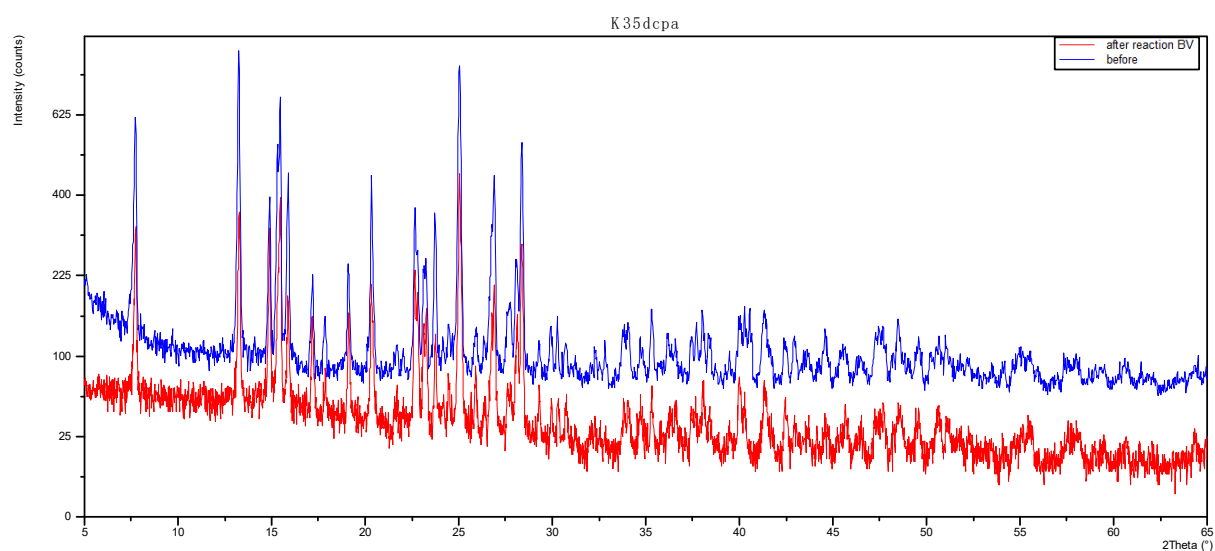

**Figure S12.** PXRD before and after BV reaction for K35dcpa.

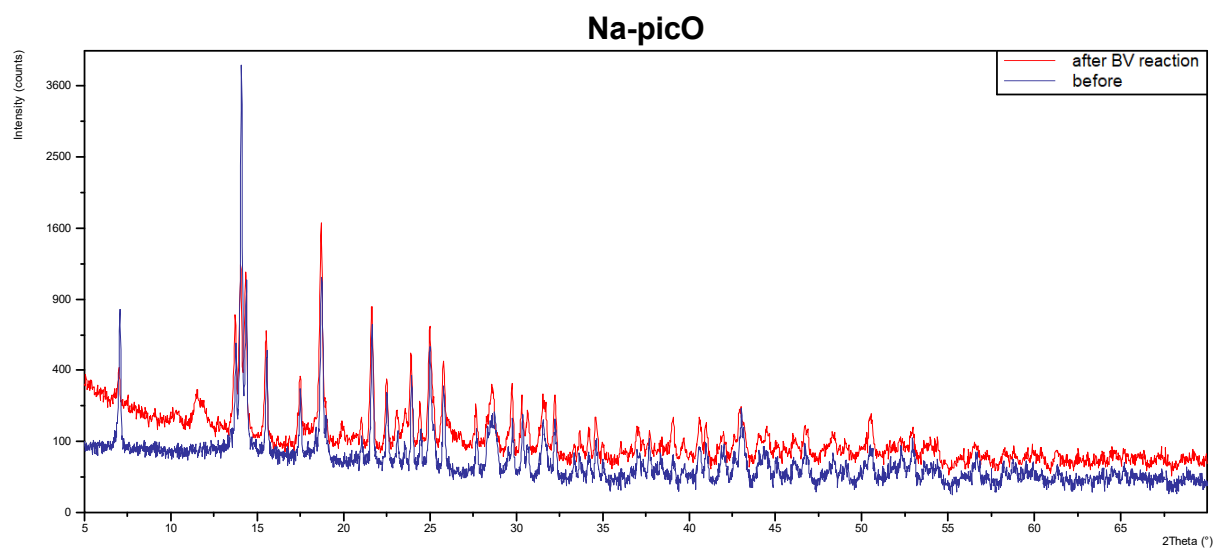

**Figure S13.** PXRD before and after BV reaction for Na-picO.



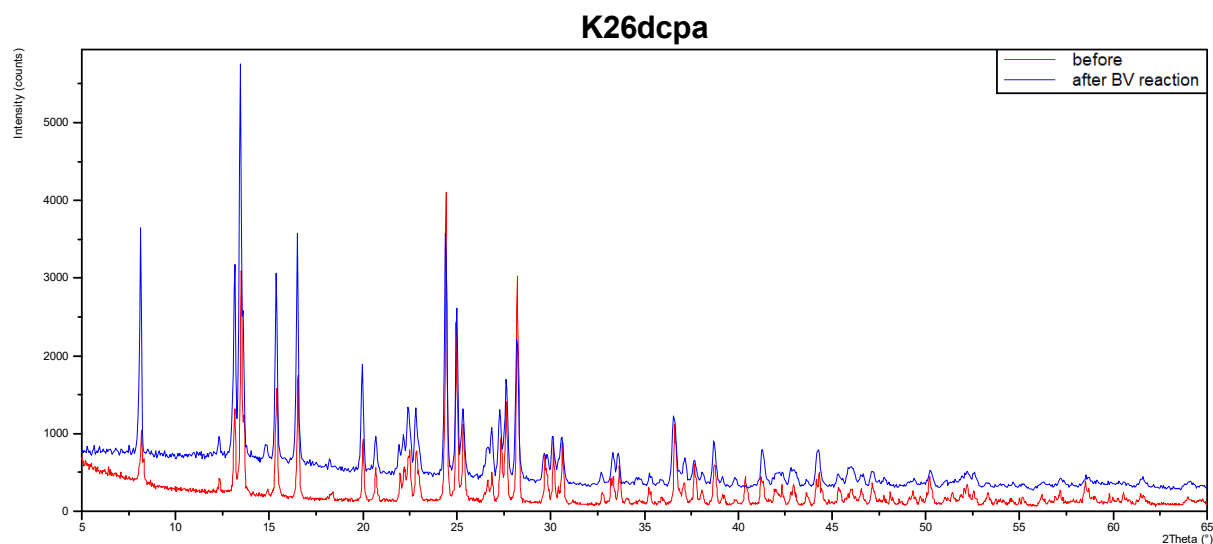

**Figure S14.** PXRD before and after BV reaction for **K26dcpa**.

**Table S2.** Result of elemental analysis for K-nicO and K-picO before and after BV reaction.

| K-nicO                |                               | K-picO                |         |
|-----------------------|-------------------------------|-----------------------|---------|
| before                | after (lost H <sub>2</sub> O) | before                | after   |
| C 18.56 (calc. 19.42) | C 20.14 (calc. 20.41)         | C 20.11 (calc. 20.41) | C 22.03 |
| N 3.6 (calc. 3.77)    | N 3.96 (calc. 3.97)           | N 3.9 (calc. 3.97)    | N 4.27  |
| H 1.616 (calc. 1.63)  | H 1.143 (calc. 1.14)          | H 1.202 (calc. 1.14)  | H 1.321 |

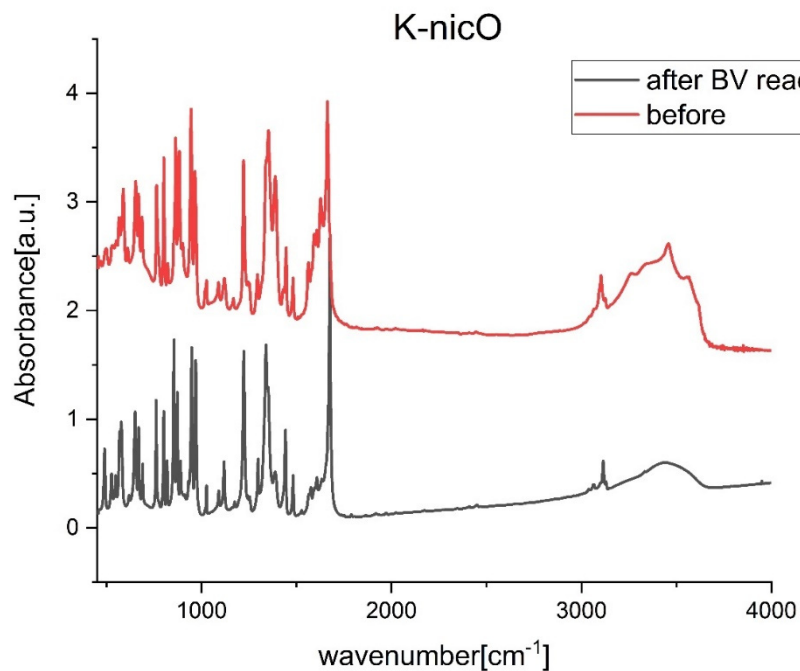

**Figure S15.** IR spectra of the compounds K-nicO before and after BV reaction.

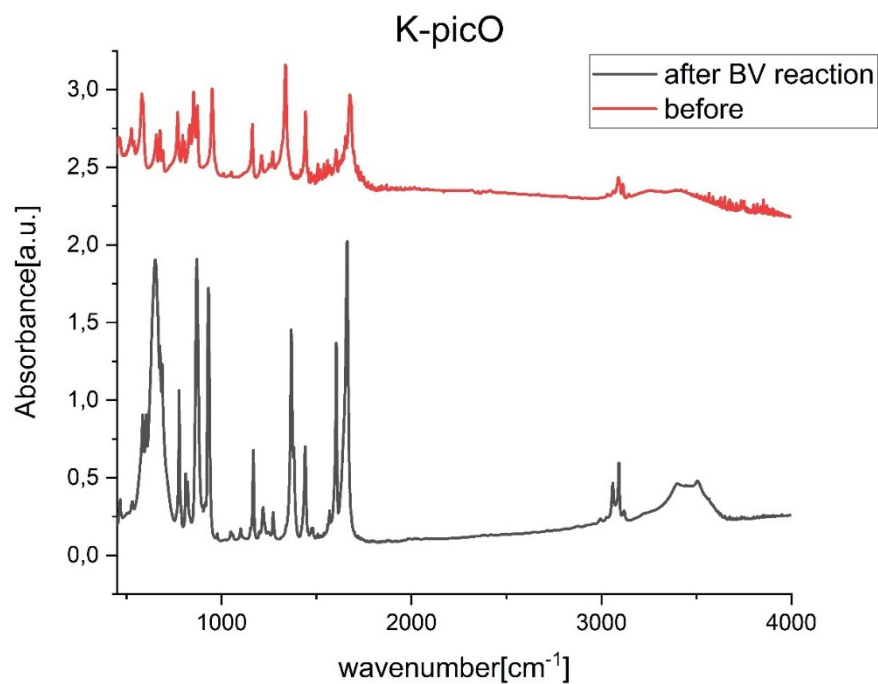

**Figure S16.** IR spectra of the compounds K-picO before and after BV reaction.

To conclude this part: Structure changes for *NH<sub>4</sub>-nicO*, **K35dcpa**, **K26dcpa** and *Na-picO* were not observed, changes in XRPD patterns were observed in the case of *K-nicO* and *K-picO*. However, chemical analysis and IR spectra (recorded for these 2 compounds) indicate only small changes in 'structure skeletons'. Probably the mild BV reaction conditions causes mostly only dehydration in the catalyst.
